# Supplementary material for: Skin Autofluorescence, a Noninvasive Biomarker of Advanced Glycation End-products, Is Associated With Frailty: The Rotterdam Study
Source: PubMed Central journal article supplement (PMC9536452; doi:10.1093/gerona/glac025), 2022-01-31

## Supplementary data - TABLES

**Supplementary Table 1. Overview of the components included in Frailty index (N=38).**

| Functional status<br>( <i>n</i> = 13) | Cognition<br>( <i>n</i> = 6) | Diseases<br>( <i>n</i> = 6)            | Health<br>conditions<br>( <i>n</i> = 6) | Nutritional<br>status ( <i>n</i> = 3) | Mood ( <i>n</i> = 4) |
|---------------------------------------|------------------------------|----------------------------------------|-----------------------------------------|---------------------------------------|----------------------|
| Dressing, arising,                    | Forgetfulness                | Cancer                                 | systolic BP                             | BMI                                   | Depressed            |
| Eating, Walking,                      | Aphasia                      | Lung condition<br>(COPD/Asthma)        | falling                                 | HDL                                   | Somatic              |
| Hygiene, Laundry                      | MMSE                         | Cardiovascular<br>diseases             | joint                                   | Hyperlipidemia                        | Positive             |
| Grip, Riding a<br>bike                | Stroop                       | Stroke                                 | liver<br>enzymes                        |                                       | Interpersonal        |
| Telephone, Meal                       | LDST                         | Diabetes<br>Mellitus                   | hospital<br>admission                   |                                       |                      |
| Gardening, Reach                      | WFT                          | age-related<br>macular<br>degeneration | Creatinine                              |                                       |                      |
| Financial                             |                              |                                        |                                         |                                       |                      |

MMSE, Mini-mental state examination; LDST, The Letter Digit Substitution Test; WFT, Word Fluency test; BP, blood pressure; BMI, Body mass index; HDL, high density lipoprotein; COPD, Chronic Obstructive Pulmonary Disease.

**Supplementary Table 2. Selected characteristics of our cohort based on an arbitrary cut-off at median value for frailty index.**

|                                           | <b>Low Frailty index below median</b> | <b>High Frailty index above median</b> |
|-------------------------------------------|---------------------------------------|----------------------------------------|
| <b>N</b>                                  | 1253                                  | 1268                                   |
| <b>Physical frailty, n (%)</b>            | 10 (0.8%)                             | 86 (6.8%)***                           |
| <b>Pre-frailty, n (%)</b>                 | 497 (39.7%)                           | 724 (57.1%)***                         |
| <b>SAF, AU</b>                            | 2.30 ± 0.45                           | 2.49 ± 0.52***                         |
| <b>Age (years)</b>                        | 71.8 (14.6)                           | 77.0 (10.2)                            |
| <b>Males, n (%)</b>                       | 552 (46%)                             | 472 (41.5%)*                           |
| <b>BMI, kg/m<sup>2</sup></b>              | 26.3 ± 3.7                            | 28.3 ± 4.5***                          |
| <b>RS I/II/III, n (%)</b>                 | 205 / 441 / 607<br>(17% /35% /38%)    | 409 / 492 / 367<br>(32% /39% /29%)**   |
| <b>Energy intake, kcal/day</b>            | 2123.3 (885.3)                        | 2053.8 (787.7)                         |
| <b>Smokers, n (%)</b>                     |                                       |                                        |
| <b>Former</b>                             | 622 (50%)                             | 726 (57%)                              |
| <b>Current</b>                            | 197 (16%)                             | 166 (13%)                              |
| <b>eGFR, ml/min per 1.73m<sup>2</sup></b> | 80.7 ± 12.9                           | 76.2 ± 15.4***                         |
| <b>Physical activity, METh/week</b>       | 50.0 (67.6)                           | 35.5 (61.5)***                         |
| <b>Diabetes - T2DM, n (%)</b>             | 80 (6%)                               | 250 (20%)***                           |
| <b>Education, n (%)</b>                   |                                       | ***                                    |
| <b>Primary</b>                            | 37 (3%)                               | 123 (10%)                              |
| <b>Lower</b>                              | 443 (35%)                             | 543 (43%)                              |
| <b>Intermediate</b>                       | 395 (32%)                             | 372 (29%)                              |
| <b>Higher</b>                             | 378 (30%)                             | 230 (18%)                              |

SAF, skin autofluorescence; AU, arbitrary units; METh/week, metabolic equivalent task hours per week; kcal/day, kilo calories per day; eGFR, effective glomerular filtration rate; T2DM, Type 2 diabetes mellitus.

Data are presented as Mean ± SD, Median (IQR) and number (percentage, %)

\*\*\* p<0.0001, \* p<0.05. P-value based on a statistical comparison of values between high and low frailty index groups calculated by independent t-test or Mann Whitney.

**Supplementary Table 3. Stratified analysis between SAF as exposure and pre-frail and physical frailty as outcomes according to diabetic status.**

|                  |     | Odds ratio (95% CI)   | p-value     |     | Odds ratio (95% CI)      | p-value     |
|------------------|-----|-----------------------|-------------|-----|--------------------------|-------------|
|                  |     | <i>T2DM (n = 330)</i> |             |     | <i>Non-T2DM (n=2191)</i> |             |
| <i>Non-frail</i> | 43% | <b>Ref.</b>           |             | 49% | <b>Ref.</b>              |             |
| <i>Pre-frail</i> | 50% | 1.56 (0.94 – 2.58)    | 0.09        | 48% | 1.25 (1.02 – 1.53)       | <b>0.03</b> |
| <i>Frail</i>     | 7%  | 2.92 (1.11 – 7.67)    | <b>0.03</b> | 3%  | 1.58 (0.95 -2.63)        | 0.08        |

Model 1 Physical frailty ~ SAF + age + sex + RS-cohorts + eGFR + DM status + smoking status +

Education level + BMI

**Supplementary Table 4. Analysis between SAF as exposure and frailty index as outcomes after excluding those with type 2 diabetes mellitus and reduced eGFR.**

|                             | N    | Standardized coefficient, $\beta$ | Unstandardized coefficient, B (95% CI) | p-value                                |
|-----------------------------|------|-----------------------------------|----------------------------------------|----------------------------------------|
| <b>Excluding T2DM</b>       | 2191 | 0.088                             | 0.013 (0.007 – 0.019)                  | <b><math>1.9 \times 10^{-5}</math></b> |
| <b>Excluding eGFR&lt;60</b> | 2235 | 0.098                             | 0.015 (0.009 – 0.021)                  | <b><math>2 \times 10^{-6}</math></b>   |
| <b>Excluding both</b>       | 1952 | 0.072                             | 0.011 (0.004 – 0.017)                  | <b>0.001</b>                           |

Model 2 Frailty index ~ SAF + age + sex + RS-cohorts + smoking + Educational level

**Supplementary Table 5. Analysis between SAF as exposure and low physical activity as outcome (using two thresholds  $\leq 30$  and  $\leq 14$  MET hours per week).**

|                                 | N        | <b>Model 1</b>      |              | <b>Model 2</b>      |             |
|---------------------------------|----------|---------------------|--------------|---------------------|-------------|
|                                 |          | Odds ratio (95% CI) | p-value      | Odds ratio (95% CI) | p-value     |
| <i>Low Physical activity_30</i> | 990/2521 | 1.30 (1.09-1.55)    | <b>0.003</b> | 1.22 (1.02-1.45)    | <b>0.03</b> |
| <i>Low Physical activity_14</i> | 506/2521 | 1.30 (1.05-1.61)    | <b>0.01</b>  | 1.18 (0.96-1.49)    | 0.13        |

Low Physical activity\_30, less than or equal to 30 metabolic equivalent of task hours per week; Low Physical activity\_14, less than or equal to 14 metabolic equivalent of task hours per week.

Model 1 was adjusted for age, sex, and RS-cohorts.

Model 2 was additionally adjusted for eGFR, DM status, smoking status, Education level and BMI

**Supplementary Table 6. Multinomial logistic regression between SAF as exposure and pre-frailty and physical frailty as outcomes when compared to non-frail individuals after excluding those with confirmed sarcopenia.**

|                | <b>Pre-frail (N= 1090 or 47%)</b> |              | <b>Frail (N= 76 or 3%)</b> |              |
|----------------|-----------------------------------|--------------|----------------------------|--------------|
|                | Odds ratio (95% CI)               | p-value      | Odds ratio (95% CI)        | p-value      |
|                | Ref. (non-frail)                  |              | Ref. (non-frail)           |              |
| <b>Model 1</b> | 1.31 (1.08 – 1.58)                | <b>0.005</b> | 2.21 (1.37 – 3.57)         | <b>0.001</b> |
| <b>Model 2</b> | 1.23 (1.01 – 1.49)                | <b>0.04</b>  | 2.10 (1.28 – 3.46)         | <b>0.003</b> |

Model 1 was adjusted for age, sex, and RS-cohorts.

Model 2 was additionally adjusted for eGFR, DM status, smoking status, Education level and BMI

**Supplementary data – FIGURES**

**Supplementary Figure 1. Flowchart of participants inclusion from the Rotterdam study.**

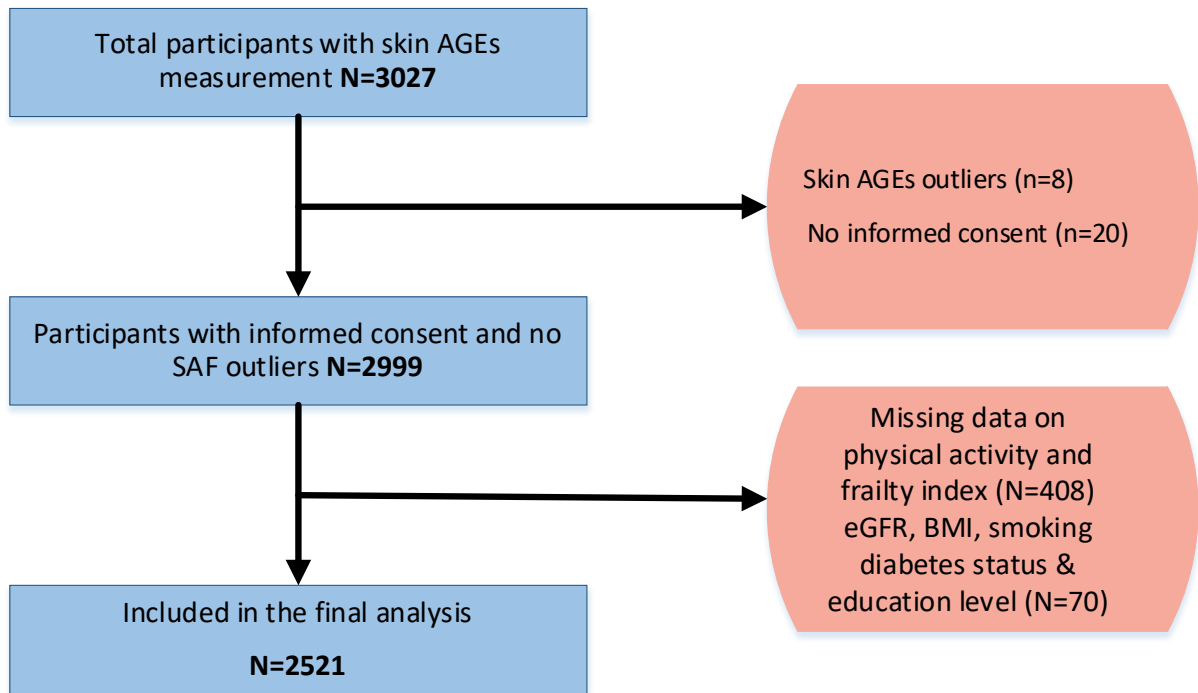

Supplementary Figure 2. Percentage of participants having individual physical frailty components.

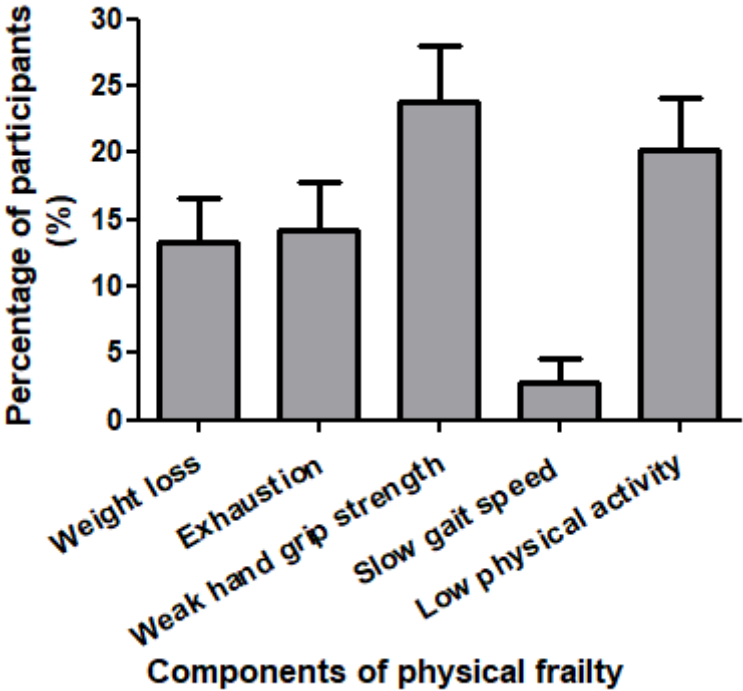

Supplement: glac025_suppl_supplementary_material.pdf [file glac025_suppl_supplementary_material.pdf]
